# Supplementary material for: Multilayered TiO2@SnO2hollow nanostructures: facile synthesis and enhanced photocatalytic performance
Source: Royal Society of Chemistry journal article supplement (doi:10.1039/c4ra12103a), 2014-11-03
Supplement: c4ra12103a1.pdf [file c4ra12103a1.pdf]

## Supporting Information

### **Multilayered TiO<sub>2</sub>@SnO<sub>2</sub> hollow nanostructures: facile synthesis and enhanced photocatalytic performance**

Jing Wang,<sup>a</sup> Xiuying Wang,<sup>\*a,b</sup> Xiaoli Dong,<sup>\*a</sup> Xiufang Zhang,<sup>a</sup> Hongchao Ma<sup>a</sup> and Xu Fei<sup>b</sup>

<sup>a</sup> School of Light Industry and Chemical Engineering, Dalian Polytechnic University, #1 Qinggongyuan, Dalian 116034, P R China

<sup>b</sup> Instrumental Analysis Center, Dalian Polytechnic University, #1 Qinggongyuan, Dalian 116034, P R China

\* Corresponding author: Fax: +86 411 86323736

E-mail address: [wang\\_xy@dlpu.edu.cn](mailto:wang_xy@dlpu.edu.cn), [dongxl@dlpu.edu.cn](mailto:dongxl@dlpu.edu.cn)

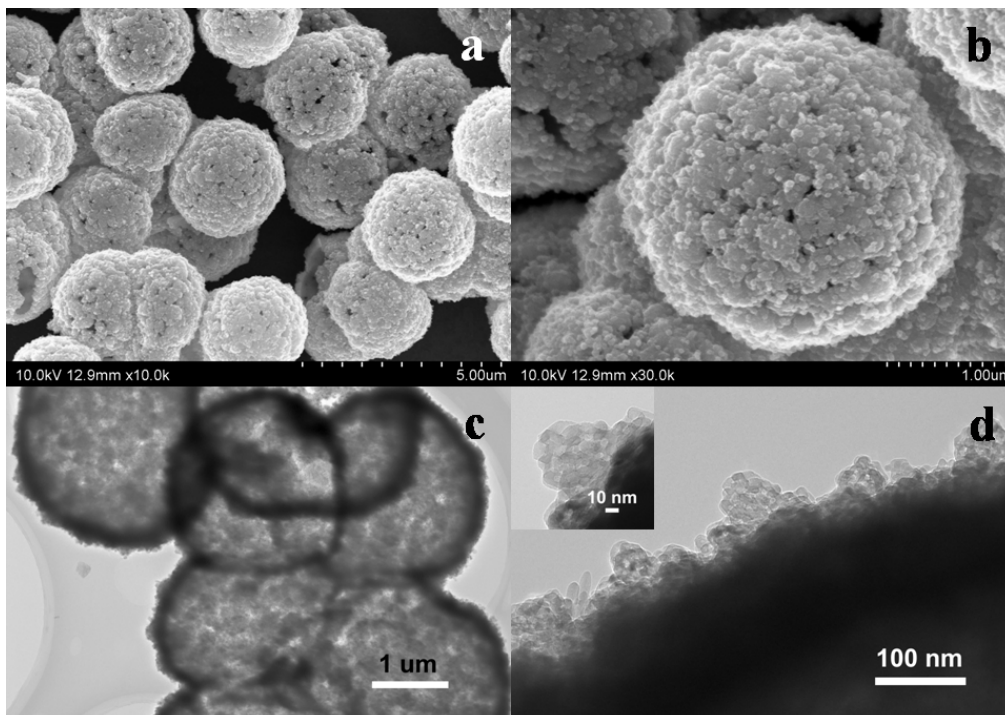

**Fig. S1** (a, b) SEM and (c, d) TEM images of TiO<sub>2</sub>-450.

**Table S1** Specific surface area and pore volume of the materials.

| Sample                | Specific surface area (m <sup>2</sup> ·g <sup>-1</sup> ) | Pore volume (cm <sup>3</sup> g <sup>-1</sup> ) |
|-----------------------|----------------------------------------------------------|------------------------------------------------|
| P25                   | 42.8                                                     | 0.161                                          |
| TiO <sub>2</sub> -450 | 81.223                                                   | 0.123                                          |
| S-450                 | 70.867                                                   | 0.189                                          |
| S-550                 | 59.261                                                   | 0.184                                          |
| S-650                 | 44.107                                                   | 0.179                                          |
| S-750                 | 30.796                                                   | 0.170                                          |
| S-850                 | 10.722                                                   | 0.096                                          |

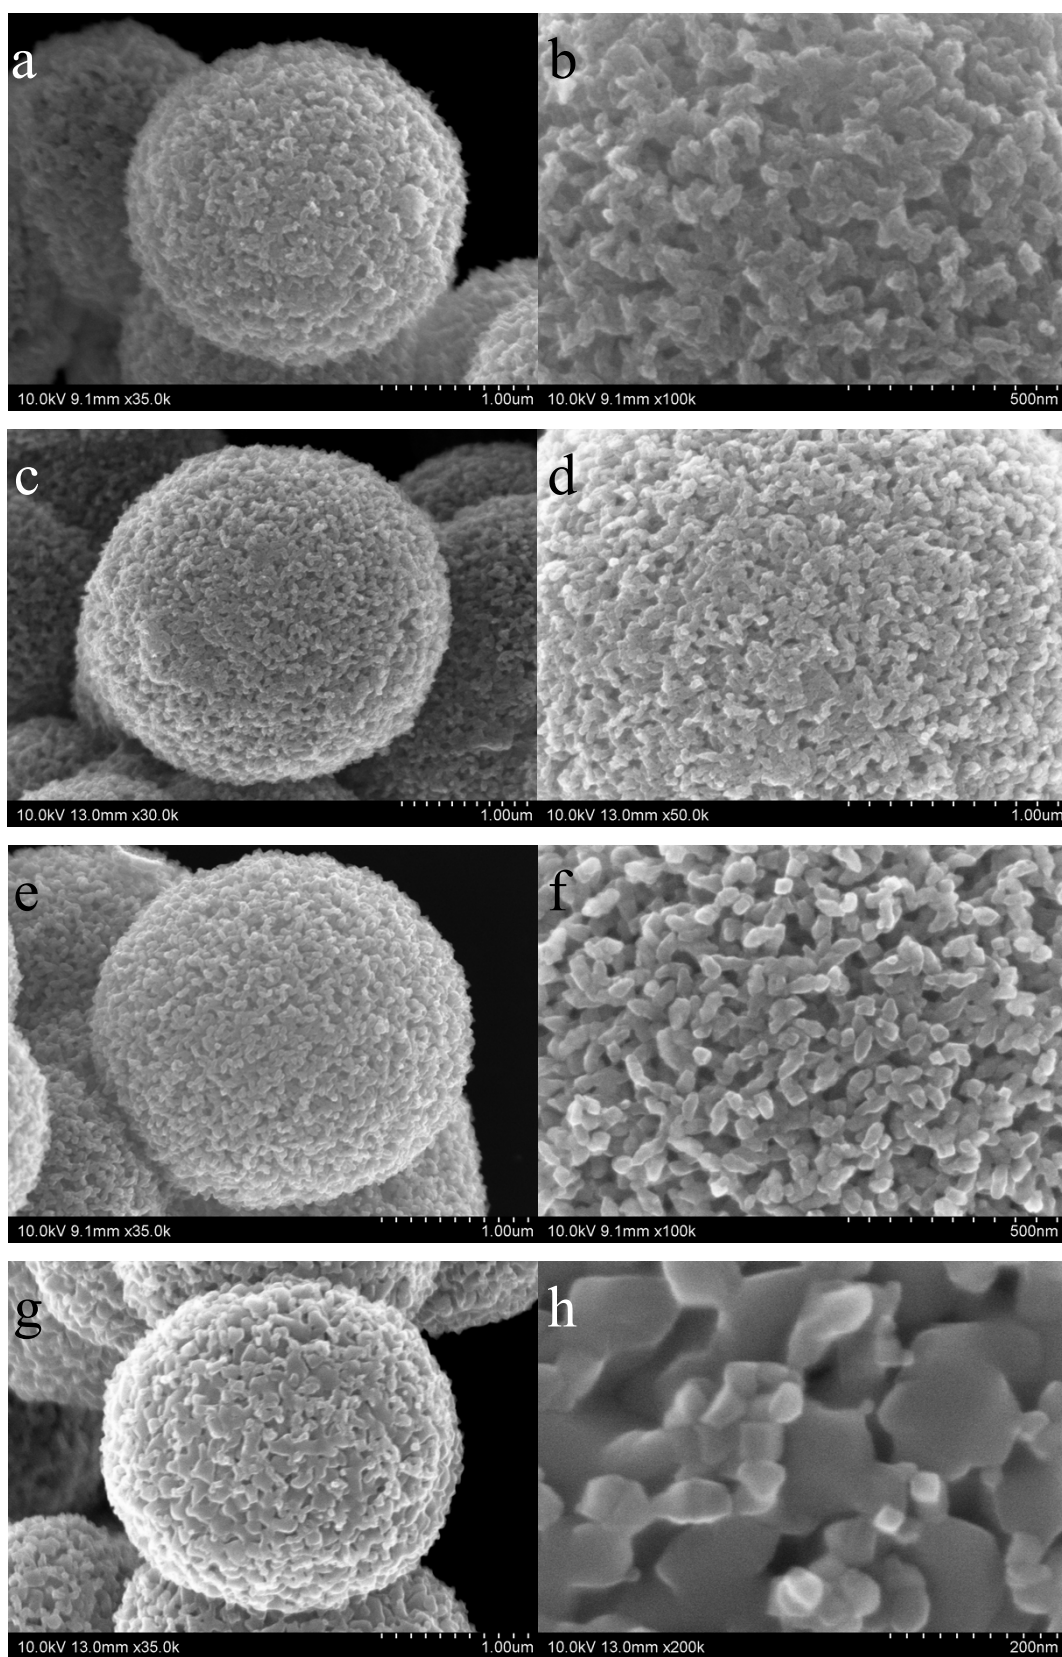

**Fig. S2** SEM images of (a, b) S-550, (c, d) S-650, (e, f) S-750 and (g, h) S-850.

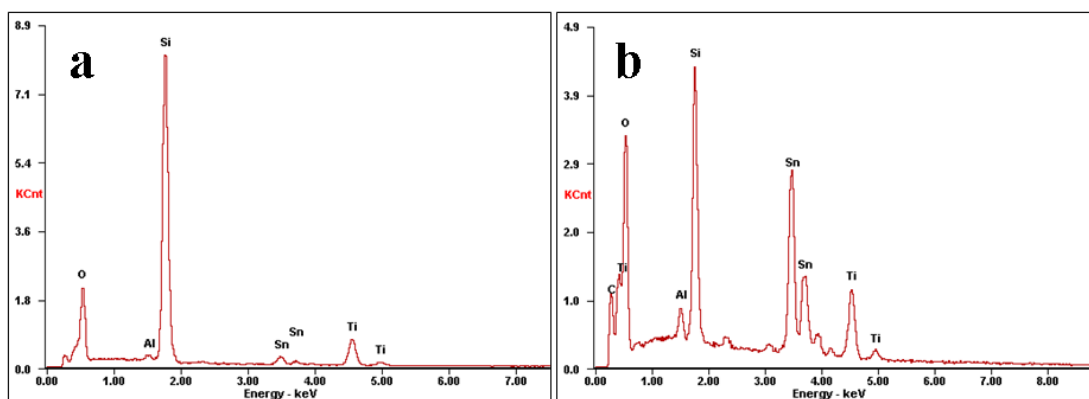

**Fig. S3** EDS images of the (a) exterior shell and (b) interior shell of S-450. Al and Si signals resulted from the substrate.

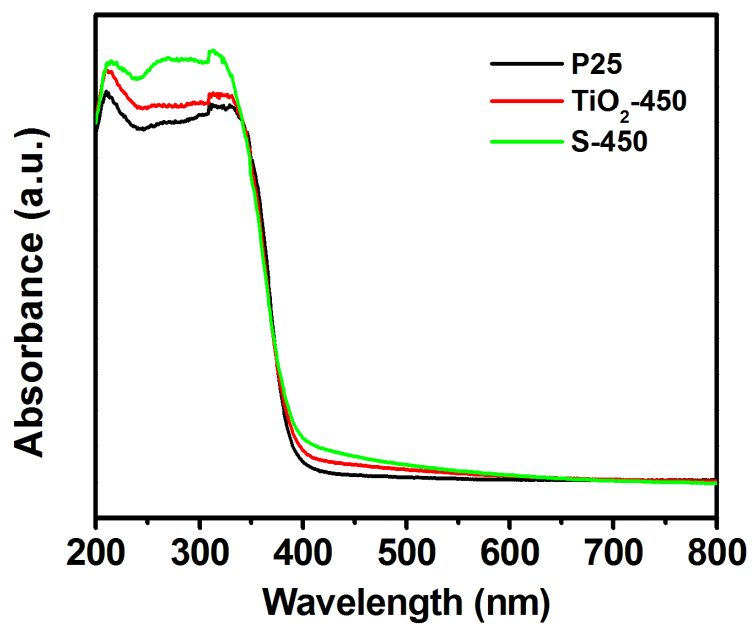

**Fig. S4** UV-vis diffuse reflectance spectra of P25, TiO<sub>2</sub>-450 and S-450.
